# Supplementary material
Source: PubMed Central journal article supplement (PMC4645621)
Supplement: supp_M115.669333_jbc.M115.669333-1.pdf [file supp_M115.669333_jbc.M115.669333-1.pdf]

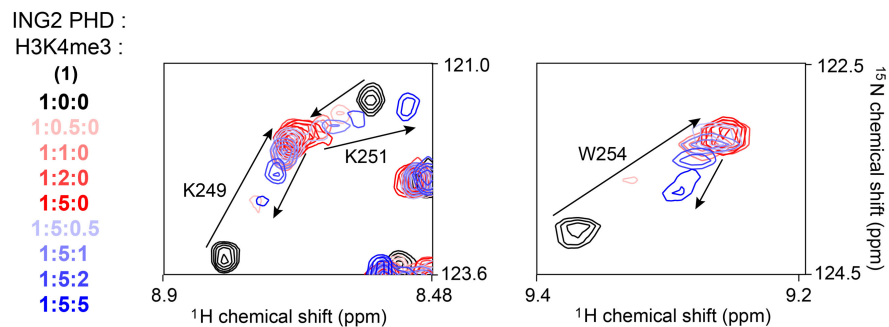

**Figure S1, Related to Figure 3.** Superimposed  $^1\text{H}$ ,  $^{15}\text{N}$  HSQC spectra of ING2 PHD collected as first H3K4me3 peptide and then (1) were titrated in. Spectra are color coded according to the protein:peptide:(1) molar ratio.

## SI Experimental Procedures

### Synthesis - General

Calixarene **1** was purchased from TCI America and used as obtained. Lucigenin dye was purchased from Life Technologies and used as obtained. Low-resolution electrospray ionization mass spectrometry (LR-ESI-MS) was performed on a Finnigan LCQ MS, and High-resolution electrospray ionization mass spectrometry (HR-ESI-MS) was performed on a Thermo Scientific LTQ Velos Orbitrap. Calixarene (3), (4), (6), and 5-phenyl-25, 26, 27, 28-tetrahydroxy-11-17-23-trisulfonatocalix[4]arene (8) were made according to published procedures (Allen et al., 2014; Daze et al., 2012).

### HPLC purifications

Synthetic peptides and compounds (2-7) were purified by RP-HPLC using a Shimadzu Prominence HPLC equipped with a preparative Apollo C18 column (Alltech, 5  $\mu$ m, 22 x 250 mm) or a Thermo-Dionex HPLC/MS equipped with a Luna C-18 column (Phenomenex, 5  $\mu$ m, 21.2 x 250 mm). Each instrument used a UV-Vis detector set to 280 nm. Compounds were purified by running a gradient from 90:10 0.1% TFA in H<sub>2</sub>O:0.1% TFA in MeCN to 10:90 0.1% TFA in H<sub>2</sub>O:0.1% TFA in MeCN over 35 minutes.

### Synthesis of calixarenes (2), (5), and (7).

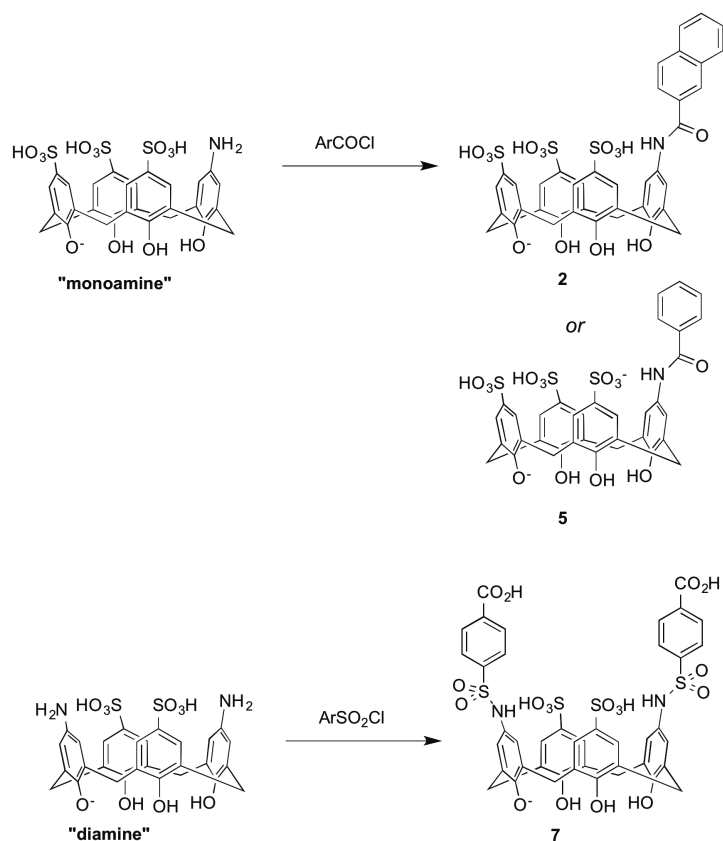

## Compound (2)

Compound **monoamine** (25 mg,  $3.7 \times 10^{-5}$  mol) and 2-naphthoyl chloride (1.1 eq., 8 mg,  $4.1 \times 10^{-5}$  mol) were dissolved in 2.5 mL of 0.1 M phosphate buffer (pH = 8) and 100  $\mu\text{L}$  of dimethylformamide then stirred at room temperature, overnight. The aqueous solution was extracted with dichloromethane (2 x 10 mL), and ethyl acetate (2 x 10 mL). The aqueous layer was evaporated to dryness under reduced pressure and the crude solid subjected to RP-HPLC purification, as outlined above. Fractions containing product were pooled and lyophilized to afford 9 mg (28% yield) as an off-white solid. NMR (300 MHz,  $\text{D}_2\text{O}$ ,  $\delta$ ): 3.78 (br s, 2H), 4.0 (br s, 8H), 5.21 (d, 7.9 Hz, 1H), 6.85 (s, 2H), 7.02 (d, 8.2 Hz, 1H), 7.19 (d, 8.6 Hz, 1H), 7.25 (d, 8.6 Hz, 1H), 7.35 (s, 2H), 7.47 (s, 1H), 7.75 (s, 2H), 7.81 (s, 2H). LR-ESI-MS  $[\text{M}-\text{H}]^-$  calculated for  $\text{C}_{39}\text{H}_{30}\text{NO}_{14}\text{S}_3^-$  832.1, found 832.3.

### Compound (5)

Compound **monoamine** (20 mg,  $2.9 \times 10^{-5}$  mol) and benzoyl chloride (1.1 eq., 4  $\mu$ L,  $3.13 \times 10^{-5}$  mol) were dissolved in 2.5 mL of 0.1 M phosphate buffer (pH = 8) and stirred at room temperature, overnight. The aqueous solution was extracted with dichloromethane (2 x 10 mL), and ethyl acetate (2 x 10 mL). The aqueous layer was evaporated to dryness under reduced pressure and the crude solid subjected to RP-HPLC purification, as outlined above. Fractions containing product were pooled and lyophilized to afford 11 mg (48% yield) as an off-white solid. NMR (300 MHz, D<sub>2</sub>O,  $\delta$ ): 3.91 (br s, 4H), 4.07 (br s, 4H), 5.33 (s, 2H), 7.07 (m, 4H), 7.42 (s, 2H), 7.68 (s, 2H), 7.71 (s, 2H). LR-ESI-MS [M-H]<sup>-</sup> calculated for C<sub>35</sub>H<sub>28</sub>NO<sub>14</sub>S<sub>3</sub><sup>-</sup> 782.1, found 782.3.

### Compound (7)

Compound **diamine** (20 mg,  $3.3 \times 10^{-5}$  mol) and *p*-carboxybenzenesulfonyl chloride (1.9 eq., 13.6 mg,  $6.3 \times 10^{-5}$  mol) were dissolved in 2.5 mL of 0.1 M phosphate buffer (pH = 8) and stirred at room temperature, overnight. The aqueous solution was extracted with dichloromethane (2 x 10 mL), and ethyl acetate (2 x 10 mL). The aqueous layer was evaporated to dryness under reduced pressure and the crude solid subjected to RP-HPLC purification, as outlined above. Fractions containing product were pooled and lyophilized to afford 6 mg (16% yield) as an off-white solid. NMR (300 MHz, D<sub>2</sub>O,  $\delta$ ): 3.84 (br s, 8H), 6.72 (d, 8.3 Hz, 4H), 6.88 (d, 8.3 Hz, 4H), 6.89 (s, 4H), 7.44 (s, 4H). HR-ESI-MS [M-2H]<sup>2-</sup> calculated for C<sub>42</sub>H<sub>32</sub>N<sub>2</sub>O<sub>18</sub>S<sub>4</sub><sup>2-</sup> 490.0271, found 490.0272.

### Peptide Synthesis

Peptides were made using a CEM Liberty 1 microwave peptide synthesizer, using standard Fmoc-solid phase synthesis employing HBTU as coupling agent and DIEA as activator base. Fmoc-Lys(me<sub>3</sub>)-OH was purchased from GL Biochem and all other reagents were purchased from Sigma-Aldrich or ChemImpex. Peptides were made as H3 1-12 sequences (H-ARTKQTARK(me<sub>3</sub>)STGY-

NH<sub>2</sub>, H-ARTK(me<sub>3</sub>)QTARKSTGY-NH<sub>2</sub> or H-ARTKQTARKSTGY-NH<sub>2</sub>), with a N-terminal free amine, C-terminal amide and tyrosine added to the C-terminus to aid in UV detection for purification and concentration determination. Peptides were purified by HPLC as described above, and identity confirmed by ESI-MS. Concentration of peptide stocks was determined by dissolving the lyophilized solid into water and using the extinction coefficient of tyrosine at 280 nm (Spectramax M5, Molecular Devices).

### **Fluorescence Displacement Assay - General**

Calixarene hosts were made in stock solutions from weighed solid and dissolved in dH<sub>2</sub>O. All further dilutions were done using this stock. Lucigenin (LCG) was made from a stock 5 mM solution in dH<sub>2</sub>O, and protected from light. 0.2 M phosphate buffer at pH 7.4 was made from the corresponding salts and used as is, 10  $\mu$ L amounts were used in every well to furnish a final buffer concentration of 10 mM. Peptide solutions were freshly prepared and concentrations confirmed as outlined above. All titrations were performed in 96 well NUNC optically clear-bottomed, black-walled plates and read using a Spectramax M5 (Molecular Devices) plate reader.

### **Determination of $K_{\text{assoc}}$ between calixarene and LCG**

Using a calixarene stock solution, varying concentrations of calixarenes were made (0.05  $\mu$ M-50  $\mu$ M). The first well was a blank solution that contained 10  $\mu$ L 0.2 M phosphate buffer, 20  $\mu$ L (2.5 or 5  $\mu$ M) LCG and 170  $\mu$ L dH<sub>2</sub>O. Subsequent wells (2-12) contained the same amounts except: 150  $\mu$ L dH<sub>2</sub>O and 20  $\mu$ L calixarene (in increasing concentration). The plate emission was read (100 reads/well) between 445-600 nm, excitation set to 369 nm. The  $\lambda_{\text{max}}$  of the fluorescence readout was selected (485 nm) and this data was fit with the program Equilibria (available online at: <http://www.sseau.unsw.edu.au>) in order to determine the 1:1 binding constant.

### **Determination of $K_{\text{assoc}}$ between calixarene and peptide**

Similar to above, the first well in each row was a blank containing 20  $\mu\text{L}$  (2.5 or 5  $\mu\text{M}$ ) LCG, 20  $\mu\text{L}$  (5 or 12.5  $\mu\text{M}$ ) calixarene, 10  $\mu\text{L}$  0.2 M phosphate buffer and 150  $\mu\text{L}$   $\text{dH}_2\text{O}$ . Titration was performed as above except, using varying peptide concentrations (20  $\mu\text{L}$ , 5  $\mu\text{M}$  to 7 mM) and 130  $\mu\text{L}$   $\text{dH}_2\text{O}$ . Fitting was done as outlined above in the program Equilibria, (Young and Jolliffe, 2012) provided that LCG and calixarene concentrations remain constant and using the determined  $K_{\text{assoc}}$  between calixarene and LCG as an input.

## SI REFERENCES

Allen, H.F., Daze, K.D., Shimbo, T., Lai, A., Musselman, C.A., Sims, J.K., Wade, P.A., Hof, F., and Kutateladze, T.G. (2014). Inhibition of histone binding by supramolecular hosts. *Biochem J* 459, 505-512.

Daze, K.D., Ma, M.C., Pineux, F., and Hof, F. (2012). Synthesis of new trisulfonated calix[4]arenes functionalized at the upper rim, and their complexation with the trimethyllysine epigenetic mark. *Organic letters* 14, 1512-1515.

Young, P.G., and Jolliffe, K.A. (2012). Selective recognition of sulfate ions by tripodal cyclic peptides functionalised with (thio)urea binding sites. *Org. Biomol. Chem.* 10, 2664-2672.
